# Supplementary material
Source: PubMed Central journal article supplement (PMC4057949)
Supplement: NIHMS581459-supplement-Supp_DataS2.pdf [file NIHMS581459-supplement-Supp_DataS2.pdf]

### Extra-operative Neurostimulation Mapping Survey

1. Approximately how many patients in the following age categories have undergone extraoperative stimulation mapping at your center during 2008?

Language:  Under age 5  6-9  10-17  18 – 60  over 60  
 Total:  Under age 5  6-9  10-17  18 – 60  over 60

#### Language Testing

2. What personnel are typically involved in language mapping procedures? Check all that apply.

- Epileptologist/Neurophysiologist
- Neuropsychologist
- EEG technologist
- Other MD including fellows/residents (assisting, not just observing)
  - Other PhD including neuropsychology fellows (assisting, not just observing)
- Other (please specify) \_\_\_\_\_

3. Which tests do you use to establish baseline language function?

- Boston Naming Test
- Columbia Auditory Naming Test
- Columbia Visual Naming Test
- Other (please specify) \_\_\_\_\_
- Phonemic fluency
- Semantic fluency

4. Preoperative language lateralization/localization: Please indicate with check marks which procedures are in use at your center and the approximate proportion of patients who undergo each prior to extraoperative language mapping.

|      |                                   |                                |                                   |                                 |                                  |
|------|-----------------------------------|--------------------------------|-----------------------------------|---------------------------------|----------------------------------|
| Wada | <input type="checkbox"/> Not used | <input type="checkbox"/> 1-25% | <input type="checkbox"/> 26 – 50% | <input type="checkbox"/> 51-75% | <input type="checkbox"/> 76-100% |
| fMRI | <input type="checkbox"/> Not used | <input type="checkbox"/> 1-25% | <input type="checkbox"/> 26 – 50% | <input type="checkbox"/> 51-75% | <input type="checkbox"/> 76-100% |
| MEG  | <input type="checkbox"/> Not used | <input type="checkbox"/> 1-25% | <input type="checkbox"/> 26 – 50% | <input type="checkbox"/> 51-75% | <input type="checkbox"/> 76-100% |

5. Which of the following types of language testing do you routinely perform during extra-operative mapping? Check all that apply.

- Spontaneous speech
- Counting
- Automatic speech such as over learned poem/song (e.g., Pledge of Allegiance)
- Visual object/picture naming
- Auditory description naming
- Reading
- Other: \_\_\_\_\_
- Oral comprehension/following commands
- Sentence completion (e.g., “I take milk and sugar in my \_\_\_”)
- Repetition
- Writing
- Phonemic fluency
- Semantic fluency
- Phoneme identification

6. Which types of responses during stimulation do you consider an error? Check all that apply.

- No verbal response
- Anomia (e.g., “this is a ...I know it...”)
- Paraphasic error
- Hesitation
- Perseveration

7. What is the minimum number of trials per task that you administer at each site? \_\_\_\_\_

8. What is the proportion of errors required to consider a site "positive for language"?

\_\_\_ 25 % \_\_\_ 50 % \_\_\_ 67% \_\_\_ 75% \_\_\_ 100%

Other (please describe) \_\_\_\_\_

9. If tongue motor or sensory function is found do you test for language at that site?

\_\_\_ Yes, routinely \_\_\_ Yes, if finding is subtle \_\_\_ No

10. In preserving a positive site, how close can the resection boundary be (check closest answer)?

\_\_\_ 0 cm \_\_\_ 0.5 cm \_\_\_ 1 cm \_\_\_ 1.5 cm \_\_\_ 2.0 cm \_\_\_ adjacent gyrus

11. Do you typically map these regions? Check all that apply.

\_\_\_ Basal temporal region \_\_\_ Insular cortex (via grid or depth electrodes)  
\_\_\_ Anterolateral temporal region

12. Please indicate the approximate proportion of patients (%) who have experienced a transient or persistent decline after resection of any of the following positive sites (leave blank if not applicable).

|                                                            | <u>Transient</u> | <u>Persistent (&gt;= 1 year)</u> |
|------------------------------------------------------------|------------------|----------------------------------|
| Visual picture naming in anterior/inferior temporal cortex | _____            | _____                            |
| Visual picture naming in superior temporal gyrus           | _____            | _____                            |
| Visual picture naming in basal temporal region             | _____            | _____                            |
| Auditory description naming                                | _____            | _____                            |
| Reading                                                    | _____            | _____                            |
| Other: _____                                               | _____            | _____                            |

13. Have you had a persistent postoperative language deficit occur despite not removing any positive sites?

\_\_\_ Yes \_\_\_ No

14. If so, to what did you attribute the decline (check all that apply):

- \_\_\_ resection was too close to identified positive site
- \_\_\_ inadequate electrode coverage
- \_\_\_ insufficient functions tested
- \_\_\_ unable to completely test resection area due to afterdischarges or induced seizures
- \_\_\_ resection included subcortical structures or white matter tracts
- \_\_\_ multiple subpial transections over eloquent cortex
- \_\_\_ unrelated surgical complication
- \_\_\_ unable to speculate

Other: \_\_\_\_\_

Comments on language mapping:

**Motor Testing**

15. Do you routinely localize hand motor/sensory areas prior to mapping? Check all that apply.

- No
- Yes, by locating mu rhythm on intracranial EEG recording (iEEG)
- Yes, with median nerve SSEP intraoperatively
- Yes, with median nerve SSEP extraoperatively
- Yes, by measuring induced gamma activity on iEEG
- Other procedure (please specify): \_\_\_\_\_

16. Do you use any special procedures to distinguish primary motor from premotor or associative areas?

- No
- Yes, by testing entrainment to 1 Hz stimulation
- Yes, by looking for negative motor findings with stimulation
- Yes, other method/criteria (please describe): \_\_\_\_\_

17. Please indicate the approximate proportion of patients (%) who have experienced a transient or persistent decline after resection of any of the following positive sites. (Leave blank if not applicable).

|                             | <u>Transient</u> | <u>Persistent</u> |
|-----------------------------|------------------|-------------------|
| Clonic tongue movements     | _____ %          | _____ %           |
| Tongue deviation            | _____            | _____             |
| Induced motor weakness      | _____            | _____             |
| Lower face clonic movements | _____            | _____             |
| Upper face clonic movements | _____            | _____             |
| Other 1: _____              | _____            | _____             |
| Other 2: _____              | _____            | _____             |

**Comments on motor mapping:**

**Neurostimulation**

18. What manufacturer and model stimulator do you use? (Please note: this question is not for marketing or other commercial purposes, and will not be shared with any manufacturers.)

\_\_\_\_\_

19. Indicate the frequencies that you routinely use for each test modality. Circle all that apply. If the same settings are used for motor and language testing, check the appropriate response and leave the language column blank.

| <u>Motor</u>    | <u>Language, if different</u> | <input type="checkbox"/> I use the same frequencies for both language and motor mapping |
|-----------------|-------------------------------|-----------------------------------------------------------------------------------------|
| 1 Hz            | 1 Hz                          |                                                                                         |
| 5 Hz            | 5 Hz                          |                                                                                         |
| 10 Hz           | 10 Hz                         |                                                                                         |
| 20 Hz           | 20 Hz                         |                                                                                         |
| 30 Hz           | 30 Hz                         |                                                                                         |
| 50 Hz or higher | 50 Hz or higher               |                                                                                         |

20. What settings for pulse duration do you normally use? Circle all that apply. If the same settings are used for adult and pediatric testing, check the appropriate response and leave the pediatric column blank.

| <u>Adult</u> | <u>Pediatric (&lt; age 10), if different</u> | <input type="checkbox"/> I use the same pulse duration for both adult and pediatric mappings |
|--------------|----------------------------------------------|----------------------------------------------------------------------------------------------|
| 0.2 ms       | 0.2 ms                                       |                                                                                              |
| 0.3 ms       | 0.3 ms                                       |                                                                                              |
| 0.5 ms       | 0.5 ms                                       |                                                                                              |
| 1 ms         | 1 ms                                         |                                                                                              |
| 2 ms         | 2 ms                                         |                                                                                              |
| Other _____  | Other _____                                  |                                                                                              |

21. How long is your maximum train of stimulation?

Motor mapping: \_\_\_\_\_ seconds      Language mapping: \_\_\_\_\_ seconds

22. What are the minimum settings you consider sufficient to classify an electrode pair as a negative site? Leave blank if you never base this decision on absolute settings.

|           | <u>Adult</u>         | <u>Pediatric (&lt; age 10), if different</u> | <input type="checkbox"/> I use the same criteria for both adult and pediatric mappings |
|-----------|----------------------|----------------------------------------------|----------------------------------------------------------------------------------------|
| Motor:    | _____ mA<br>_____ Hz | _____ mA<br>_____ Hz                         |                                                                                        |
| Other     | _____                | _____                                        |                                                                                        |
| Language: | _____ mA<br>_____ Hz | _____ mA<br>_____ Hz                         | <input type="checkbox"/> I use the same criteria for both language and motor mapping   |
| Other     | _____                | _____                                        |                                                                                        |

23. What is the maximum current setting that you use for

|                   |              |                                              |                                                                                       |
|-------------------|--------------|----------------------------------------------|---------------------------------------------------------------------------------------|
|                   | <u>Adult</u> | <u>Pediatric (&lt; age 10), if different</u> |                                                                                       |
| Motor testing?    | _____ mA     | _____ mA                                     | <input type="checkbox"/> I use the same setting for both adult and pediatric mappings |
| Language testing? | _____ mA     | _____ mA                                     | <input type="checkbox"/> I use the same setting for both language and motor mapping   |

24. What strategy do you use to increase stimulation parameters at each site? Check all that apply.

Increase current to threshold/maximum  Adult  Pediatric  
 Increase pulse width and amperage together to threshold/maximum  Adult  Pediatric  
 Other (describe): \_\_\_\_\_

25. What is the longest time you will map in one session?

One hour  
 Two hours  
 Three hours  
 No pre-set time limit  
 No pre-set time limit, instead I use a clinical indicator (check all that apply):  
 Decline in baseline functioning  
 Increased focal iEEG slowing  
 Total charge delivered exceeds set limit  
 How do you determine total charge? \_\_\_\_\_  
 Other (describe): \_\_\_\_\_

26. What electrode pairing strategy do you use? Check all that apply.

Pair all electrodes to be tested with a distant negative (cleared) site  
 Test adjacent pairs first, then:  
 Re-test positive sites by pairing each electrode with an adjacent, negative electrode  
 Re-test positive sites by pairing each electrode with a distant negative electrode  
 Test adjacent electrode pairs only  
 Other (describe): \_\_\_\_\_

27. How do you define an afterdischarge?

One or more discharges following stimulation  
 Run of two or more discharges following stimulation  
 Sustained train of discharges for a minimum of 1 second following stimulation  
 Other (describe) \_\_\_\_\_

28. When the afterdischarge threshold is below the minimum setting you consider necessary to adequately test a site, how do you respond? Please rank the following interventions by indicating "1" for the intervention you do first, "2" for the second intervention, etc. Leave interventions blank if this is not something you would do routinely.

- \_\_\_ Wait 1-5 minutes and try again
- \_\_\_ Reduce frequency
- \_\_\_ Reduce pulse width
- \_\_\_ Reduce pulse train length
- \_\_\_ Stop mapping and give medication, then try again
- \_\_\_ Other (describe): \_\_\_\_\_

29. Do you test function during a sustained afterdischarge? \_\_\_ Yes \_\_\_ No

If yes, do you consider the site negative if no motor or language disruption is noted during the stimulation that preceded the afterdischarge? \_\_\_ Yes \_\_\_ No  
 after the stimulation and during the afterdischarge? \_\_\_ Yes \_\_\_ No

If yes, do you consider the site positive if motor or language disruption is noted during the stimulation that preceded the afterdischarge? \_\_\_ Yes \_\_\_ No  
 after the stimulation and during the afterdischarge? \_\_\_ Yes \_\_\_ No

30. How do you manage anticonvulsant medications (AEDs) for a mapping?

- \_\_\_ Medication reduction is not a contraindication to mapping
- \_\_\_ Restart oral AEDs then map later the same day
- \_\_\_ Restart oral AEDs then map the next day
- \_\_\_ Restart oral AEDs and pretreat with an IV medication, then map later the same day
- \_\_\_ Pretreat with an IV medication, then map later the same day
- \_\_\_ Other: \_\_\_\_\_

31. What medications do you use for pretreating, if any, and what are your typical starting doses? Complete all that apply.

- |                                               |                     |
|-----------------------------------------------|---------------------|
| IV: lorazepam _____                           | levetiracetam _____ |
| midazolam _____                               | valproic acid _____ |
| diazepam _____                                | phenobarbital _____ |
| fosphenytoin _____                            | lacosamide _____    |
| Other: (specify agent, dose, and route) _____ |                     |

**Comments on neurostimulation:**
